# Supplementary material for: Sage, Rosemary, and Bay Laurel Hydrodistillation By-Products as a Source of Bioactive Compounds
Source: MDPI journal article supplement (doi:10.3390/plants12132394), 2023-06-21
Supplement: s1 [file s1]

Supplementary Materials of the Manuscript

# Sage, Rosemary, and Bay Laurel Hydrodistillation By-Products as a Source of Bioactive Compounds

Andela Miljanović <sup>1</sup>, Maja Dent <sup>1</sup>, Dorotea Grbin <sup>1</sup>, Sandra Pedisić <sup>1</sup>, Zoran Zorić <sup>1</sup>, Zvonimir Marijanović <sup>2</sup>, Igor Jerković <sup>2</sup> and Ana Bielen <sup>1,\*</sup>

## Supplementary Tables

**Table S1.** Chemical composition of sage hydrolates (obtained in this study) compared with the chemical composition of their respective essential oils (reported in Miljanović et al., 2020). The hydrolates and essential oils were obtained by hydrodistillation with and without different pre-treatments: HD – hydrodistillation without pre-treatment, HD-RE – hydrodistillation with reflux extraction pre-treatment, HD-US - hydrodistillation with ultrasound extraction pre-treatment, HD-REXPC – hydrodistillation with reflux extraction pre-treatment assisted with cell wall-degrading enzymes (xylanase, pectinase and cellulase). RI<sub>E</sub> – experimental retention index on HP-5MS column; RI<sub>L</sub> – retention index from NIST Standard Reference Database 69: NIST Chemistry WebBook (<https://webbook.nist.gov/chemistry/>). Major compounds (≥ 5% total peak area in any sample) are marked in blue.

| Sage         |                          | Compound            | RI <sub>E</sub> | RI <sub>L</sub> | % total peak area |               |           |               |           |               |           |               |
|--------------|--------------------------|---------------------|-----------------|-----------------|-------------------|---------------|-----------|---------------|-----------|---------------|-----------|---------------|
|              |                          |                     |                 |                 | HD                |               | HD-RE     |               | HD-REXPC  |               | HD-US     |               |
|              |                          |                     |                 |                 | Hydrolate         | Essential oil | Hydrolate | Essential oil | Hydrolate | Essential oil | Hydrolate | Essential oil |
| Monoterpenes | Monoterpene hydrocarbons | <i>cis</i> -salvene | < 900           | 867             | -                 | 0.01          | -         | 0.01          | -         | 0.15          | -         | 0.01          |
|              |                          | Tricyclene          | 929             | 927             | -                 | 0.03          | -         | 0.04          | -         | 0.10          | -         | 0.01          |
|              |                          | α-thujene           | 932             | 931             | -                 | 0.01          | -         | 0.01          | -         | 0.01          | -         | 0.01          |
|              |                          | α-pinene            | 941             | 941             | -                 | 1.25          | -         | 1.03          | -         | 2.64          | -         | 1.83          |
|              |                          | Camphene            | 956             | 954             | -                 | 1.49          | -         | 1.94          | -         | 3.85          | -         | 2.91          |
|              |                          | Verbenene           | 962             | 967             | -                 | 0.04          | -         | -             | -         | -             | -         | -             |
|              |                          | Sabinene            | 979             | 980             | -                 | 0.01          | -         | 0.01          | -         | 0.01          | -         | 0.01          |

|  |                            |                                    |      |      |       |       |       |       |       |       |       |       |
|--|----------------------------|------------------------------------|------|------|-------|-------|-------|-------|-------|-------|-------|-------|
|  |                            | $\beta$ -pinene                    | 982  | 982  | -     | 0.45  | -     | 0.47  | -     | 0.46  | -     | 0.40  |
|  |                            | $\beta$ -myrcene                   | 992  | 992  | -     | 0.08  | -     | 0.12  | -     | 0.53  | -     | 0.37  |
|  |                            | $\delta$ -car-3-ene                | 1014 | 1013 | -     | 0.05  | -     | -     | -     | -     | -     | -     |
|  |                            | $\alpha$ -terpinene                | 1021 | 1020 | -     | 0.01  | -     | 0.01  | -     | 0.09  | -     | 0.01  |
|  |                            | <i>p</i> -cymene                   | 1030 | 1030 | -     | 0.19  | -     | 0.22  | -     | 0.99  | -     | 0.90  |
|  |                            | Limonene                           | 1034 | 1032 | -     | 0.10  | -     | 0.32  | -     | 1.46  | -     | 1.16  |
|  |                            | $\gamma$ -terpinene                | 1063 | 1062 | -     | 0.03  | -     | 0.01  | -     | 0.08  | -     | 0.01  |
|  |                            | $\alpha$ -terpinolene              | 1091 | 1085 | -     | 0.06  | -     | 0.01  | -     | 0.05  | -     | 0.01  |
|  | Oxygenated<br>monoterpenes | <b>1,8-cineole</b>                 | 1038 | 1038 | 15.85 | 5.22  | 9.20  | 4.56  | 17.11 | 7.23  | 13.33 | 8.22  |
|  |                            | <i>trans</i> -linalool oxide       | 1077 | 1077 | 0.18  | -     | 0.02  | -     | 0.43  | -     | 0.21  | -     |
|  |                            | <i>cis</i> -linalool oxide         | 1091 | 1091 | 0.17  | -     | 0.03  | -     | 0.40  | -     | 0.18  | -     |
|  |                            | Linalool                           | 1104 | 1104 | 2.64  | 2.17  | 2.22  | 0.61  | 0.58  | 0.37  | 1.24  | 0.39  |
|  |                            | <b><math>\alpha</math>-thujone</b> | 1110 | 1110 | 9.74  | 13.52 | 6.57  | 15.33 | 15.71 | 18.18 | 16.48 | 23.48 |
|  |                            | <b><math>\beta</math>-thujone</b>  | 1121 | 1122 | 3.08  | 6.57  | 1.94  | 6.63  | 5.51  | 8.51  | 5.34  | 10.22 |
|  |                            | Chrysanthenone                     | 1129 | 1126 | 0.38  | 0.21  | 0.34  | -     | -     | 0.04  | -     | -     |
|  |                            | Thujyl alcohol                     | 1141 | 1146 | -     | 0.45  | -     | 0.38  | -     | 0.23  | -     | 0.27  |
|  |                            | <b>Camphor</b>                     | 1149 | 1148 | 30.99 | 12.99 | 30.95 | 11.69 | 34.88 | 12.43 | 33.54 | 17.03 |
|  |                            | Pinocarpvone                       | 1167 | 1165 | 0.06  | 0.07  | -     | -     | -     | -     | -     | -     |
|  |                            | <b>Borneol</b>                     | 1172 | 1172 | 11.89 | 7.73  | 14.68 | 5.77  | 9.60  | 4.12  | 11.44 | 5.18  |
|  |                            | <i>trans</i> -pinocarpvone         | 1179 | 1173 | 0.62  | 0.33  | 0.62  | -     | -     | -     | -     | -     |
|  |                            | 4-terpineol                        | 1182 | 1184 | 1.75  | 0.92  | 1.99  | 0.65  | 1.30  | 0.44  | 2.29  | 0.53  |
|  |                            | <i>p</i> -cymen-8-ol               | 1191 | 1193 | 0.96  | 0.28  | 1.31  | 0.18  | 1.25  | 0.12  | 1.15  | 0.01  |
|  |                            | $\alpha$ -terpineol                | 1195 | 1190 | 2.20  | 0.99  | 2.82  | 0.31  | 0.81  | 0.18  | 1.25  | 0.01  |
|  |                            | Myrtenol                           | 1200 | 1193 | -     | 0.37  | -     | 0.13  | -     | 0.05  | -     | -     |
|  |                            | Homomyrtenol                       | 1208 | 1212 | -     | 0.39  | -     | -     | -     | -     | -     | -     |
|  |                            | <i>trans</i> -carveol              | 1224 | 1223 | 0.25  | 0.17  | 0.33  | 0.11  | 0.30  | 0.07  | 0.32  | -     |
|  |                            | Geraniol                           | 1261 | 1267 | -     | 0.11  | -     | 0.01  | -     | -     | 0.12  | -     |

|                |                            |                                     |      |      |              |              |              |              |              |              |              |              |
|----------------|----------------------------|-------------------------------------|------|------|--------------|--------------|--------------|--------------|--------------|--------------|--------------|--------------|
|                |                            | Bornyl acetate                      | 1287 | 1285 | 0.11         | 1.31         | -            | 1.20         | 0.13         | 1.09         | -            | 1.00         |
|                |                            | <i>trans</i> -sabinyl acetate       | 1294 | 1291 | -            | 0.61         | -            | 0.51         | -            | 0.39         | -            | 0.16         |
|                |                            | <i>trans</i> -carvyl acetate        | 1341 | 1342 | -            | 0.04         | -            | -            | -            | -            | -            | -            |
|                |                            | $\alpha$ -terpenyl acetate          | 1355 | 1351 | -            | 0.25         | -            | 0.68         | -            | -            | -            | -            |
|                | <b>Total monoterpenes</b>  |                                     |      |      | <b>80.87</b> | <b>58.51</b> | <b>73.02</b> | <b>52.95</b> | <b>88.01</b> | <b>63.78</b> | <b>86.89</b> | <b>74.23</b> |
| Sesquiterpenes | Sesquiterpene hydrocarbons | $\alpha$ -ylangene                  | 1373 | 1372 | -            | 0.06         | -            | -            | -            | 0.04         | -            | -            |
|                |                            | $\alpha$ -copaene                   | 1378 | 1377 | -            | 0.18         | -            | -            | -            | 0.11         | -            | -            |
|                |                            | $\beta$ -elemene                    | 1393 | 1387 | -            | -            | -            | -            | -            | -            | -            | -            |
|                |                            | <i>trans</i> -caryophyllene         | 1421 | 1420 | -            | 1.21         | -            | 0.73         | -            | 0.51         | -            | 0.30         |
|                |                            | $\alpha$ -cadinene                  | 1540 | 1541 | -            | 0.04         | -            | 0.01         | -            | 0.07         | -            | 0.01         |
|                |                            | $\alpha$ -guaiane                   | 1441 | 1442 | -            | 0.01         | -            | 0.01         | -            | 0.01         | -            | 0.01         |
|                |                            | $\alpha$ -humulene                  | 1456 | 1455 | -            | 3.15         | -            | 3.44         | -            | 3.00         | -            | 1.76         |
|                |                            | Alloaromadendrene                   | 1462 | 1462 | -            | 0.06         | -            | 0.01         | -            | 0.08         | -            | 0.01         |
|                |                            | $\alpha$ -amorphene                 | 1478 | 1482 | -            | 0.32         | -            | 0.19         | -            | 0.25         | -            | 0.01         |
|                |                            | $\beta$ -selinene                   | 1488 | 1489 | -            | 0.05         | -            | -            | -            | -            | -            | -            |
|                |                            | Ledene                              | 1496 | 1470 | -            | -            | -            | -            | -            | 0.16         | -            | -            |
|                |                            | $\alpha$ -muurolene                 | 1501 | 1500 | -            | 0.13         | -            | -            | -            | 0.07         | -            | -            |
|                |                            | $\beta$ -bisabolene                 | 1510 | 1509 | -            | 0.07         | -            | -            | -            | -            | -            | -            |
|                |                            | $\gamma$ -cadinene                  | 1515 | 1514 | -            | 0.26         | -            | 0.07         | -            | 0.10         | -            | 0.01         |
|                |                            | $\delta$ -cadinene                  | 1525 | 1523 | -            | 0.67         | -            | 0.35         | -            | 0.37         | -            | 0.21         |
|                |                            | <i>trans</i> - $\alpha$ -bisabolene | 1545 | 1545 | -            | -            | -            | 0.01         | -            | -            | -            | -            |
|                |                            | $\alpha$ -calacorene                | 1546 | 1546 | -            | 0.08         | -            | 0.01         | -            | 0.01         | -            | -            |
|                | Oxygenated sesquiterpenes  | <b>Berbenone</b>                    | 1212 | 1209 | 9.34         | 2.10         | 14.85        | 0.01         | -            | -            | -            | -            |
|                |                            | Spathulenol                         | 1581 | 1582 | -            | -            | -            | 0.10         | -            | -            | -            | -            |
|                |                            | Caryophyllene oxide                 | 1584 | 1583 | -            | 1.00         | -            | 0.86         | 0.20         | 0.25         | 0.65         | -            |
|                |                            | <b>Viridiflorol</b>                 | 1594 | 1593 | -            | 10.13        | -            | 14.39        | -            | 10.64        | -            | 6.52         |
|                |                            | $\alpha$ -caryophylladienol         | 1640 | 1637 | -            | 0.31         | -            | -            | -            | -            | -            | -            |

|        |                           |                         |       |      |       |       |       |       |       |       |       |       |
|--------|---------------------------|-------------------------|-------|------|-------|-------|-------|-------|-------|-------|-------|-------|
|        |                           | $\alpha$ -cadinol       | 1646  | 1643 | -     | -     | -     | 0.16  | -     | 0.09  | -     | -     |
|        |                           | $\beta$ -eudesmol       | 1654  | 1648 | -     | 0.10  | -     | 0.18  | -     | 0.06  | -     | -     |
|        |                           | t-muurolol              | 1658  | 1659 | -     | 0.19  | -     | 0.27  | -     | 0.09  | -     | -     |
|        |                           | (E,E)-farnesyl acetone  | 1919  | 1918 | -     | 0.15  | -     | -     | -     | -     | -     | -     |
|        |                           | Manool                  | 2055  | 2055 | -     | 8.30  | -     | 13.74 | -     | 11.47 | -     | 14.33 |
|        | Total sesquiterpenes      |                         |       |      | 9.34  | 28.57 | 14.85 | 34.54 | 0.20  | 27.38 | 0.65  | 23.17 |
| Others | Phenylpropane derivatives | Thymol                  | 1296  | 1294 | -     | 0.04  | -     | 0.36  | -     | 0.06  | -     | 0.01  |
|        |                           | Carvacrol               | 1307  | 1302 | 0.09  | 0.50  | 0.32  | 0.01  | 0.16  | 0.26  | 0.15  | 0.01  |
|        |                           | Eugenol                 | 1363  | 1362 | 0.14  | 0.23  | 0.41  | 0.36  | 0.24  | 2.68  | 0.92  | -     |
|        |                           | Methyleugenol           | 1409  | 1408 | -     | 0.15  | -     | 0.34  | -     | -     | 0.75  | -     |
|        |                           | Elemicin                | 1561  | 1560 | -     | -     | -     | -     | -     | -     | -     | -     |
|        | Other compounds           | (E)-hex-2-enal          | < 900 | 841  | 0.25  | -     | 0.14  | -     | 0.35  | -     | 0.21  | -     |
|        |                           | (E)-hex-2-en-1-ol       | < 900 | 854  | 0.03  | -     | 0.01  | -     | 0.05  | -     | 0.03  | -     |
|        |                           | Hexan-1-ol              | < 900 | 867  | 0.05  | -     | 0.01  | -     | 0.05  | -     | 0.06  | -     |
|        |                           | Oct-1-en-3-ol           | 983   | 981  | 0.46  | -     | 0.34  | -     | 0.40  | -     | 0.46  | -     |
|        |                           | Octan-3-ol              | 998   | 996  | -     | -     | -     | -     | -     | -     | 0.04  | -     |
|        |                           | Phenylacetaldehyde      | 1049  | 1049 | 0.08  | -     | 0.02  | -     | 0.17  | -     | 0.06  | -     |
|        |                           | 2-methoxy-4-vinylphenol | 1319  | 1317 | -     | -     | -     | -     | 0.13  | -     | -     | -     |
|        |                           | Methyl jasmonate        | 1651  | 1655 | -     | 0.11  | -     | -     | -     | -     | -     | -     |
|        |                           | Pentadecanal            | 1715  | 1713 | -     | 0.03  | -     | -     | -     | -     | -     | -     |
|        |                           | Hexadecan-1-ol          | 1885  | 1883 | -     | 0.01  | -     | -     | -     | -     | -     | -     |
|        | Total others              |                         |       |      | 1.1   | 1.07  | 1.25  | 1.07  | 1.55  | 0.32  | 2.68  | 0.02  |
|        | Total:                    |                         |       |      | 91.31 | 88.15 | 89.12 | 88.56 | 89.76 | 91.48 | 90.22 | 97.42 |

**Table S2.** Chemical composition of bay laurel hydrolates (obtained in this study) compared with the chemical composition of their respective essential oils (reported in Miljanović et al., 2020). The hydrolates and essential oils were obtained by hydrodistillation with and without different pre-treatments: HD – hydrodistillation without pre-treatment, HD-RE – hydrodistillation with reflux extraction pre-treatment, HD-US - hydrodistillation with ultrasound extraction pre-treatment, HD-REPCX – hydrodistillation with reflux extraction pre-treatment assisted with cell wall-degrading enzymes (xylanase, pectinase and cellulase). RI<sub>E</sub> – experimental retention index on HP-5MS column; RI<sub>L</sub> – retention index from NIST Standard Reference Database 69: NIST Chemistry WebBook (<https://webbook.nist.gov/chemistry/>). Major compounds (≥ 5% total peak area in any sample) are marked in blue.

| Bay laurel   |                          | Compound              | RI <sub>E</sub> | RI <sub>L</sub> | % total peak area |               |           |               |           |               |           |               |
|--------------|--------------------------|-----------------------|-----------------|-----------------|-------------------|---------------|-----------|---------------|-----------|---------------|-----------|---------------|
|              |                          |                       |                 |                 | HD                |               | HD-RE     |               | HD-REPCX  |               | HD-US     |               |
|              |                          |                       |                 |                 | Hydrolate         | Essential oil | Hydrolate | Essential oil | Hydrolate | Essential oil | Hydrolate | Essential oil |
| Monoterpenes | Monoterpene hydrocarbons | α-thujene             | 932             | 931             | - <sup>a</sup>    | 0.04          | -         | 0.04          | -         | 0.01          | -         | 0.09          |
|              |                          | α-pinene              | 941             | 941             | -                 | 0.56          | -         | 1.12          | -         | 1.88          | -         | 1.10          |
|              |                          | Camphene              | 956             | 954             | -                 | 0.28          | -         | 0.21          | -         | 0.02          | -         | 0.23          |
|              |                          | Sabinene              | 979             | 980             | -                 | 1.08          | -         | 1.23          | -         | 2.74          | -         | 1.74          |
|              |                          | β-pinene              | 982             | 982             | -                 | 0.66          | -         | 0.89          | -         | 1.47          | -         | 0.84          |
|              |                          | β-myrcene             | 992             | 992             | -                 | 0.11          | -         | 0.04          | -         | 0.02          | -         | 0.12          |
|              |                          | δ-car-3-ene           | 1014            | 1013            | -                 | -             | -         | 0.05          | -         | 0.01          | -         | 0.07          |
|              |                          | α-terpinene           | 1021            | 1020            | -                 | 0.05          | -         | 0.01          | -         | 0.02          | -         | 0.15          |
|              |                          | p-cymene              | 1030            | 1030            | -                 | 0.14          | -         | 0.09          | -         | 0.04          | -         | 0.32          |
|              |                          | Limonene              | 1034            | 1032            | -                 | 0.01          | -         | 0.01          | -         | 0.62          | -         | 0.76          |
|              |                          | γ-terpinene           | 1063            | 1062            | -                 | 0.08          | -         | 0.07          | -         | 0.02          | -         | 0.28          |
|              |                          | α-terpinolene         | 1091            | 1085            | -                 | 0.03          | -         | -             | -         | -             | -         | 0.08          |
|              | Oxygenated monoterpenes  | 1,8-cineole           | 1038            | 1038            | 46.90             | 13.26         | 36.39     | 16.86         | 34.43     | 27.10         | 40.53     | 19.56         |
|              |                          | cis-sabinene hydrate  | 1073            | 1074            | -                 | 0.10          | -         | 0.33          | -         | -             | -         | 0.22          |
|              |                          | trans-linalool oxide  | 1077            | 1077            | -                 | -             | -         | -             | 0.13      | -             | -         | -             |
|              |                          | cis-linalool oxide    | 1091            | 1091            | -                 | -             | -         | -             | 0.10      | -             | -         | -             |
|              |                          | Linalool              | 1104            | 1104            | 8.75              | 7.80          | 4.47      | 6.39          | 7.66      | 4.91          | 4.42      | 4.92          |
|              |                          | α-thujone             | 1110            | 1110            | 1.60              | 3.51          | -         | 1.09          | 0.10      | 0.09          | -         | 1.18          |
|              |                          | β-thujone             | 1121            | 1122            | 0.61              | 1.97          | -         | 0.45          | -         | 0.06          | 0.31      | 0.53          |
|              |                          | cis-p-menth-2-en-1-ol | 1127            | 1125            | -                 | -             | -         | -             | -         | -             | -         | 0.06          |

|                |                             |                            |      |      |       |       |       |       |       |       |       |       |
|----------------|-----------------------------|----------------------------|------|------|-------|-------|-------|-------|-------|-------|-------|-------|
|                |                             | Chrysanthenone             | 1129 | 1126 | -     | -     | -     | 0.13  | -     | -     | -     | 0.06  |
|                |                             | Thujyl alcohol             | 1141 | 1146 | -     | 0.09  | -     | -     | -     | -     | -     | -     |
|                |                             | Terpenene-1-ol             | 1146 | 1144 | -     | 0.11  | -     | -     | -     | -     | -     | 0.07  |
|                |                             | Camphor                    | 1149 | 1148 | 4.23  | 2.90  | 13.08 | 2.69  | 1.36  | 1.57  | 5.56  | 1.93  |
|                |                             | Pinocarvone                | 1167 | 1165 | -     | -     | -     | 0.09  | -     | -     | -     | 0.12  |
|                |                             | Borneol                    | 1172 | 1172 | 3.27  | 2.04  | 7.99  | 3.05  | 3.19  | 1.74  | 4.38  | 1.55  |
|                |                             | Isopinocamphe              | 1178 | 1181 | -     | -     | -     | 0.20  | -     | -     | -     | -     |
|                |                             | 4-terpineol                | 1182 | 1184 | 4.66  | 1.83  | 3.87  | 1.93  | 5.09  | 2.65  | 4.39  | 1.71  |
|                |                             | p-cymen-8-ol               | 1191 | 1193 | -     | -     | -     | 0.08  | 0.16  | -     | 0.33  | 0.05  |
|                |                             | $\alpha$ -terpineol        | 1195 | 1190 | 11.1  | 3.76  | 6.62  | 4.25  | 11.55 | 5.26  | 9.67  | 3.84  |
|                |                             | Myrtenol                   | 1200 | 1193 | -     | -     | -     | 0.14  | -     | -     | -     | -     |
|                |                             | Homomyrtenol               | 1208 | 1212 | -     | -     | -     | 0.21  | -     | -     | -     | -     |
|                |                             | Nerol                      | 1233 | 1232 | -     | 0.35  | -     | 0.48  | 0.37  | 0.56  | -     | 0.21  |
|                |                             | Linalyl acetate            | 1259 | 1259 | -     | 0.29  | -     | 0.07  | -     | 0.01  | -     | 0.02  |
|                |                             | Geraniol                   | 1261 | 1267 | -     | -     | -     | 0.10  | -     | -     | -     | -     |
|                |                             | Bornyl acetate             | 1287 | 1285 | -     | 1.97  | -     | 0.83  | -     | 0.83  | -     | 0.64  |
|                |                             | trans-sabinyl acetate      | 1294 | 1291 | -     | 0.15  | -     | -     | -     | -     | -     | -     |
|                |                             | $\delta$ -terpinyl acetate | 1319 | 1316 | -     | 0.90  | -     | 0.63  | -     | 0.46  | -     | 0.54  |
|                |                             | 2-acetoxy-1,8-cineole      | 1344 | 1344 | -     | 0.16  | -     | 0.19  | -     | 0.02  | -     | 0.12  |
|                |                             | $\alpha$ -terpenyl acetate | 1355 | 1351 | -     | 16.94 | -     | 15.71 | -     | 18.16 | -     | 15.84 |
|                |                             | Neryl acetate              | 1367 | 1367 | -     | 0.23  | -     | 0.13  | -     | 0.01  | -     | 0.12  |
|                |                             | trans-cinnamyl acetate     | 1449 | 1448 | -     | 0.20  | -     | -     | -     | -     | -     | -     |
|                |                             | Spathulenol                | 1581 | 1576 | -     | 2.40  | -     | 1.52  | -     | 1.18  | -     | 1.62  |
|                |                             | Manool                     | 2055 | 2055 | -     | 2.10  | -     | 1.03  | -     | -     | -     | -     |
|                | Total monoterpenes          |                            |      |      | 81.12 | 66.1  | 72.42 | 62.34 | 64.14 | 70.79 | 69.59 | 60.69 |
| Sesquiterpenes | Sesquiterpenes hydrocarbons | $\alpha$ -ylangene         | 1373 | 1372 | -     | 0.15  | -     | 0.14  | -     | 0.01  | -     | 0.26  |
|                |                             | $\alpha$ -copaene          | 1378 | 1377 | -     | 0.06  | -     | 0.10  | -     | 0.01  | -     | 0.09  |

|  |                              |                                     |      |      |      |       |       |       |      |       |       |       |
|--|------------------------------|-------------------------------------|------|------|------|-------|-------|-------|------|-------|-------|-------|
|  |                              | $\beta$ -cubebene                   | 1391 | 1391 | -    | 0.06  | -     | -     | -    | -     | -     | 0.04  |
|  |                              | $\beta$ -elemene                    | 1393 | 1387 | -    | 0.50  | -     | 0.40  | -    | 0.50  | -     | 1.53  |
|  |                              | <i>trans</i> -caryophyllene         | 1421 | 1420 | -    | 1.40  | -     | 2.47  | -    | 3.99  | -     | 2.92  |
|  |                              | $\alpha$ -guaiene                   | 1441 | 1442 | -    | 0.30  | -     | 0.31  | -    | 0.49  | -     | 0.46  |
|  |                              | Guaia-3,7-diene                     | 1446 | 1440 | -    | 0.07  | -     | 0.12  | -    | 0.01  | -     | 0.18  |
|  |                              | $\alpha$ -humulene                  | 1456 | 1455 | -    | 0.67  | -     | 0.74  | -    | 0.46  | -     | 0.66  |
|  |                              | Alloaromadendrene                   | 1462 | 1462 | -    | 0.13  | -     | 0.14  | -    | 0.02  | -     | 0.18  |
|  |                              | $\alpha$ -amorphene                 | 1478 | 1482 | -    | 0.10  | -     | 0.14  | -    | 0.01  | -     | 0.12  |
|  |                              | Germacrene D                        | 1482 | 1480 | -    | 0.30  | -     | 0.37  | -    | 0.02  | -     | 0.63  |
|  |                              | $\beta$ -selinene                   | 1488 | 1489 | -    | 0.38  | -     | 0.33  | -    | 0.51  | -     | 0.59  |
|  |                              | Bicyclogermacrene                   | 1496 | 1496 | -    | 1.18  | -     | 0.83  | -    | 1.19  | -     | 1.40  |
|  |                              | Germacrene A                        | 1505 | 1504 | -    | 0.71  | -     | 0.58  | -    | 1.25  | -     | 0.87  |
|  |                              | $\gamma$ -cadinene                  | 1515 | 1514 | -    | 0.25  | -     | 0.33  | -    | 0.02  | -     | 0.52  |
|  |                              | $\delta$ -cadinene                  | 1525 | 1523 | -    | 0.44  | -     | 0.66  | -    | 0.58  | -     | 0.81  |
|  |                              | <i>trans</i> - $\alpha$ -bisabolene | 1545 | 1545 | -    | 0.32  | -     | 0.25  | -    | 0.02  | -     | 0.20  |
|  | Oxygenated<br>sesquiterpenes | <b>Berbenone</b>                    | 1212 | 1209 | -    | -     | 10.63 | 1.49  | 1.11 | 1.17  | 10.30 | 0.70  |
|  |                              | Elemol                              | 1553 | 1551 | -    | 0.13  | -     | 0.09  | -    | 0.01  | -     | 0.15  |
|  |                              | Nerolidol                           | 1568 | 1565 | -    | 0.19  | -     | 0.06  | -    | 0.02  | -     | 0.01  |
|  |                              | Caryophyllene oxide                 | 1584 | 1583 | -    | 0.70  | -     | 1.39  | -    | 1.19  | -     | 1.07  |
|  |                              | Globulol                            | 1586 | 1590 | -    | 0.18  | -     | -     | -    | -     | -     | -     |
|  |                              | Viridiflorol                        | 1594 | 1593 | -    | 4.14  | -     | 1.64  | -    | 0.02  | -     | 1.16  |
|  |                              | Isospathulenol                      | 1642 | 1640 | -    | 0.41  | -     | -     | -    | -     | -     | 0.24  |
|  |                              | $\alpha$ -cadinol                   | 1646 | 1643 | -    | 0.35  | -     | 0.37  | -    | 0.01  | -     | 0.39  |
|  |                              | $\beta$ -eudesmol                   | 1654 | 1648 | -    | 1.11  | -     | 0.67  | -    | 0.02  | -     | 0.78  |
|  |                              | $\alpha$ -eudesmol                  | 1657 | 1652 | -    | 1.25  | -     | -     | -    | -     | -     | -     |
|  |                              | t-muurolol                          | 1658 | 1659 | -    | -     | -     | 0.83  | -    | 0.01  | -     | 1.06  |
|  | Total sesquiterpenes         |                                     |      |      | 0.00 | 15.63 | 10.63 | 14.45 | 1.11 | 11.54 | 10.30 | 17.02 |

|        |                           |                      |       |      |       |       |       |       |       |       |       |       |
|--------|---------------------------|----------------------|-------|------|-------|-------|-------|-------|-------|-------|-------|-------|
| Others | Phenylpropane derivatives | p-allylanisole       | 1199  | 1197 | -     | 0.08  | -     | -     | -     | -     | -     | 0.08  |
|        |                           | 3-phenylprop-2-enal  | 1275  | 1278 | -     | 0.06  | -     | -     | -     | -     | -     | -     |
|        |                           | Thymol               | 1296  | 1294 | -     | 0.05  | -     | -     | -     | -     | -     | -     |
|        |                           | Carvacrol            | 1307  | 1302 | -     | 0.16  | -     | -     | -     | -     | -     | -     |
|        |                           | Eugenol              | 1363  | 1362 | 8.11  | 2.76  | 8.04  | 6.33  | 19.97 | 8.20  | 13.99 | 5.64  |
|        |                           | Methyleugenol        | 1409  | 1408 | 4.40  | 7.15  | 2.09  | 8.52  | 8.19  | 9.33  | 3.30  | 7.95  |
|        |                           | cis-methylisoeugenol | 1500  | 1494 | -     | 0.54  | -     | -     | -     | -     | -     | 0.32  |
|        |                           | Elemicin             | 1561  | 1560 | -     | 0.32  | -     | 0.48  | -     | 0.01  | -     | 0.37  |
|        | Other compounds           | (Z)-hex-3-en-1-ol    | < 900 | 855  | -     | -     | 1.01  | -     | 1.52  | -     | 1.24  | -     |
|        |                           | Nonan-2-one          | 1094  | 1091 | -     | -     | -     | -     | -     | -     | -     | -     |
|        |                           | Nonanal              | 1105  | 1102 | 0.63  | -     | -     | -     | -     | -     | -     | -     |
|        |                           | Decanal              | 1207  | 1204 | -     | -     | -     | -     | -     | -     | -     | -     |
|        |                           | Undecan-2-one        | 1295  | 1291 | -     | -     | -     | 0.17  | -     | -     | -     | 0.12  |
|        |                           | Pentadecan-2-one     | 1699  | 1699 | -     | -     | -     | -     | -     | -     | -     | 0.09  |
|        |                           | Hexadecanal          | 1818  | 1820 | -     | -     | -     | -     | -     | -     | -     | -     |
|        | Total others              |                      |       |      | 13.14 | 11.12 | 11.14 | 15.5  | 29.68 | 17.54 | 18.53 | 14.57 |
|        | Total:                    |                      |       |      | 94.26 | 92.85 | 94.19 | 92.29 | 94.93 | 99.87 | 98.65 | 92.28 |

**Table S3.** Chemical composition of rosemary hydrolates (obtained in this study) compared with the chemical composition of their respective essential oils (reported in Miljanović et al. 2020). The hydrolates and essential oils were obtained by hydrodistillation with and without different pre-treatments: HD – hydrodistillation without pre-treatment, HD-RE – hydrodistillation with reflux extraction pre-treatment, HD-US - hydrodistillation with ultrasound extraction pre-treatment, HD-REXPC – hydrodistillation with reflux extraction pre-treatment assisted with cell wall-degrading enzymes (xylanase, pectinase and cellulase). RI – experimental retention index on HP-5MS column; RI<sub>L</sub> – retention index from NIST Standard Reference Database 69: NIST Chemistry WebBook (<https://webbook.nist.gov/chemistry/>). Major compounds ( $\geq 5\%$  total peak area in any sample) are marked in blue.

| Rosemary     |                          | Compound                    | RI <sub>E</sub> | RI <sub>L</sub> | % total peak area |               |           |               |           |               |           |               |
|--------------|--------------------------|-----------------------------|-----------------|-----------------|-------------------|---------------|-----------|---------------|-----------|---------------|-----------|---------------|
|              |                          |                             |                 |                 | HD                |               | HD-RE     |               | HD-REPCX  |               | HD-US     |               |
|              |                          |                             |                 |                 | Hydrolate         | Essential oil | Hydrolate | Essential oil | Hydrolate | Essential oil | Hydrolate | Essential oil |
| Monoterpenes | Monoterpene hydrocarbons | <a href="#">α-pinene</a>    | 941             | 941             | 0.01              | 2.25          | -         | 3.28          | -         | 3.36          | -         | 5.88          |
|              |                          | Camphene                    | 956             | 954             | -                 | 0.47          | -         | 0.62          | -         | 0.59          | -         | 1.19          |
|              |                          | Verbenene                   | 962             | 967             | -                 | -             | -         | -             | -         | 0.19          | -         | 0.35          |
|              |                          | Sabinene                    | 979             | 980             | -                 | -             | -         | -             | -         | 0.08          | -         | -             |
|              |                          | β-pinene                    | 982             | 982             | -                 | -             | -         | 0.27          | -         | 0.28          | -         | 0.29          |
|              |                          | β-myrcene                   | 992             | 992             | -                 | -             | -         | -             | -         | -             | -         | -             |
|              |                          | <i>p</i> -cymene            | 1030            | 1030            | -                 | 0.01          | -         | 0.42          | -         | 0.15          | -         | 1.03          |
|              |                          | δ-car-3-ene                 | 1014            | 1013            | -                 | -             | -         | 0.33          | -         | 0.21          | -         | 0.51          |
|              |                          | Limonene                    | 1034            | 1032            | -                 | 0.01          | -         | 0.58          | -         | 0.25          | -         | 1.49          |
|              | Oxygenated monoterpenes  | <a href="#">1,8-cineole</a> | 1038            | 1038            | 8.35              | 4.34          | 10.36     | 9.49          | 15.98     | 7.44          | 17.08     | 4.24          |
|              |                          | <a href="#">Linalool</a>    | 1104            | 1104            | 3.64              | 5.00          | 3.57      | 5.75          | 5.86      | 5.57          | 3.43      | 1.38          |
|              |                          | Filifolone                  | 1105            | 1103            | 0.21              | -             | 0.17      | 0.38          | 0.13      | 0.29          | 0.10      | 0.29          |
|              |                          | α-thujone                   | 1110            | 1110            | 0.11              | -             | 0.07      | 0.72          | 0.12      | 0.61          | 0.85      | 3.47          |
|              |                          | β-thujone                   | 1121            | 1122            | 0.02              | -             | 0.01      | 0.38          | 0.02      | 0.35          | 0.28      | 1.49          |
|              |                          | Chrysanthenone              | 1129            | 1126            | 0.54              | 0.20          | 0.56      | 0.72          | 0.34      | 0.58          | 0.29      | 0.14          |
|              |                          | <a href="#">Camphor</a>     | 1149            | 1148            | 16.65             | 15.38         | 17.17     | 13.82         | 10.65     | 11.56         | 11.50     | 9.01          |
|              |                          | Pinocarvone                 | 1167            | 1165            | 0.017             | -             | 0.02      | 0.73          | 0.07      | 0.20          | 0.01      | 0.58          |
|              |                          | <a href="#">Borneol</a>     | 1172            | 1172            | 10.72             | 24.38         | 10.77     | 12.03         | 7.75      | 11.26         | 6.85      | 5.39          |
|              |                          | Isopinocampnone             | 1178            | 1181            | 0.79              | 0.69          | 0.20      | 1.52          | 0.42      | 1.15          | 0.32      | 0.64          |
|              |                          | 4-terpineol                 | 1182            | 1184            | 1.50              | 1.00          | 1.49      | 1.70          | 2.91      | 1.24          | 2.34      | 0.52          |

|                |                            |                             |      |      |              |              |              |              |              |              |              |              |
|----------------|----------------------------|-----------------------------|------|------|--------------|--------------|--------------|--------------|--------------|--------------|--------------|--------------|
|                |                            | <i>p</i> -cymen-8-ol        | 1191 | 1193 | -            | -            | -            | -            | -            | 0.24         | -            | -            |
|                |                            | <a href="#">α-terpineol</a> | 1195 | 1190 | -            | 5.04         | -            | 4.17         | -            | 3.34         | -            | 0.83         |
|                |                            | Myrtenol                    | 1200 | 1193 | -            | 1.28         | -            | 0.56         | -            | 0.53         | -            | -            |
|                |                            | Homomyrtenol                | 1208 | 1212 | -            | 2.39         | -            | -            | -            | 1.05         | -            | 0.23         |
|                |                            | <i>trans</i> -carveol       | 1225 | 1223 | 0.21         | -            | 0.21         | -            | 0.12         | -            | 0.10         | -            |
|                |                            | Nerol                       | 1233 | 1232 | 0.15         | -            | 0.12         | -            | 0.29         | 0.27         | 0.12         | -            |
|                |                            | Geraniol                    | 1261 | 1267 | -            | -            | -            | -            | 0.14         | 0.21         | -            | -            |
|                |                            | Bornyl acetate              | 1287 | 1285 | -            | -            | -            | 0.41         | -            | 0.23         | -            | 0.47         |
|                |                            | α-terpenyl acetate          | 1355 | 1351 | -            | -            | -            | 3.31         | -            | 2.38         | -            | -            |
|                |                            | Spathulenol                 | 1581 | 1576 | -            | -            | -            | 0.64         | -            | 1.28         | -            | -            |
|                | <b>Total monoterpenes</b>  |                             |      |      | <b>42.90</b> | <b>62.44</b> | <b>44.72</b> | <b>61.83</b> | <b>44.80</b> | <b>52.17</b> | <b>43.27</b> | <b>39.42</b> |
| Sesquiterpenes | Sesquiterpene hydrocarbons | β-elemene                   | 1393 | 1387 | -            | -            | -            | -            | -            | 0.22         | -            | -            |
|                |                            | α-copaene                   | 1378 | 1377 | -            | -            | -            | -            | -            | 0.13         | -            | -            |
|                |                            | <i>trans</i> -caryophyllene | 1421 | 1420 | -            | 1.53         | -            | 2.84         | -            | 1.47         | -            | 0.56         |
|                |                            | α-guaiene                   | 1441 | 1442 | -            | -            | -            | -            | -            | 0.11         | -            | -            |
|                |                            | α-humulene                  | 1456 | 1455 | -            | -            | -            | 0.66         | -            | 0.45         | -            | 1.24         |
|                |                            | Alloaromadendrene           | 1462 | 1462 | -            | -            | -            | -            | -            | -            | -            | -            |
|                |                            | α-amorphene                 | 1478 | 1482 | -            | -            | -            | -            | -            | 0.13         | -            | -            |
|                |                            | β-selinene                  | 1488 | 1489 | -            | -            | -            | -            | -            | 0.13         | -            | -            |
|                |                            | α-muurolene                 | 1501 | 1499 | -            | -            | -            | -            | -            | 0.14         | -            | -            |
|                |                            | γ-cadinene                  | 1515 | 1514 | -            | 0.01         | -            | 0.43         | -            | 0.28         | -            | 0.02         |
|                |                            | α-calacorene                | 1546 | 1546 | -            | -            | -            | -            | -            | 0.19         | -            | -            |
|                |                            | Germacrene A                | 1505 | 1504 | -            | -            | -            | 0.40         | -            | -            | -            | -            |
|                |                            | δ-cadinene                  | 1525 | 1523 | -            | 0.81         | -            | 1.22         | -            | 0.60         | -            | 0.69         |
|                | Oxygenated sesquiterpenes  | <a href="#">Berbenone</a>   | 1212 | 1209 | 42.04        | 21.76        | 40.05        | 12.17        | 21.56        | 9.93         | 38.86        | 5.56         |
|                |                            | Spathulenol                 | 1581 | 1582 | -            | -            | -            | 0.64         | 0.17         | 1.28         | -            | -            |
|                |                            | Caryophyllene oxide         | 1584 | 1583 | -            | -            | -            | 0.67         | -            | 0.92         | -            | -            |

|        |                             |                             |       |      |              |              |              |              |              |              |              |              |
|--------|-----------------------------|-----------------------------|-------|------|--------------|--------------|--------------|--------------|--------------|--------------|--------------|--------------|
|        |                             | Viridiflorol                | 1594  | 1593 | -            | -            | -            | -            | -            | 1.85         | -            | 14.32        |
|        |                             | $\alpha$ -caryophylladienol | 1640  | 1637 | -            | -            | -            | -            | -            | 0.83         | -            | 1.11         |
|        |                             | $\alpha$ -cadinol           | 1646  | 1643 | -            | -            | -            | 0.63         | -            | 0.82         | -            | -            |
|        |                             | $\beta$ -eudesmol           | 1654  | 1648 | -            | -            | -            | 0.84         | -            | 1.15         | -            | -            |
|        |                             | t-muurolol                  | 1658  | 1659 | -            | -            | -            | 1.54         | -            | 1.84         | -            | 0.13         |
|        |                             | Manool                      | 2055  | 2055 | -            | -            | -            | 0.45         | -            | 1.71         | -            | 22.05        |
|        | <b>Total sesquiterpenes</b> |                             |       |      | <b>42.04</b> | <b>24.11</b> | <b>40.05</b> | <b>23.53</b> | <b>21.73</b> | <b>25.1</b>  | <b>38.86</b> | <b>45.68</b> |
| Others | Phenylpropane derivatives   | Thymol                      | 1296  | 1294 | -            | -            | -            | -            | -            | 0.20         | -            | -            |
|        |                             | Carvacrol                   | 1307  | 1302 | 0.17         | -            | 0.10         | -            | 0.17         | 0.32         | 0.12         | -            |
|        |                             | <b>Eugenol</b>              | 1363  | 1362 | 0.36         | -            | 0.10         | 5.70         | 11.49        | 4.24         | 4.90         | -            |
|        |                             | <b>Methyleugenol</b>        | 1409  | 1408 | 0.25         | 0.01         | 0.09         | 3.56         | 6.36         | 2.82         | 2.71         | -            |
|        |                             | Elemicin                    | 1561  | 1560 | -            | -            | -            | 0.46         | 0.49         | 0.39         | -            | -            |
|        | Other compounds             | (E)-hex-2-enal              | < 900 | 841  | 0.04         | -            | -            | -            | -            | -            | -            | -            |
|        |                             | (Z)-hex-3-en-1-ol           | < 900 | 854  | 0.01         | -            | 0.04         | -            | 0.21         | -            | 0.12         | -            |
|        |                             | Hexan-1-ol                  | < 900 | 867  | 0.02         | -            | 0.02         | -            | -            | -            | -            | -            |
|        |                             | Benzaldehyde                | 968   | 970  | 0.02         | -            | 0.03         | -            | 0.01         | -            | 0.01         | -            |
|        |                             | Oct-1-en-3-ol               | 983   | 981  | 0.32         | -            | 0.35         | -            | 0.16         | -            | 0.19         | -            |
|        |                             | Octan-3-one                 | 988   | 985  | 0.08         | -            | 0.08         | -            | 0.01         | -            | 0.01         | -            |
|        |                             | Phenylacetaldehyde          | 1050  | 1049 | 0.02         | -            | 0.04         | -            | 0.14         | -            | 0.01         | -            |
|        |                             | Methyl jasmonate            | 1651  | 1655 | -            | -            | -            | -            | -            | 0.62         | -            | -            |
|        |                             | Hexadecan-1-ol              | 1885  | 1883 | -            | -            | -            | -            | -            | 0.13         | -            | -            |
|        | <b>Total others</b>         |                             |       |      | <b>1.29</b>  | <b>0.01</b>  | <b>0.85</b>  | <b>9.72</b>  | <b>19.04</b> | <b>8.72</b>  | <b>8.07</b>  | <b>0</b>     |
|        | <b>Total:</b>               |                             |       |      | <b>86.23</b> | <b>86.56</b> | <b>85.62</b> | <b>95.07</b> | <b>85.57</b> | <b>85.99</b> | <b>90.02</b> | <b>85.1</b>  |

**Table S4.** Chemical composition of sage water residues analysed by HPLC. Major compounds ( $\geq 3$  mg/g in any sample) are marked in **blue**.

| Sage                            | $\omega$ (mg/g) |       |          |       |
|---------------------------------|-----------------|-------|----------|-------|
|                                 | HD              | HD-RE | HD-REPCX | HD-US |
| Catechin*                       | 0.88            | 1.18  | 1.26     | 0.70  |
| Gallic acid*                    | 0.53            | 0.36  | 0.30     | 0.30  |
| Protocatechinic acid*           | N.D.            | N.D.  | 0.01     | N.D.  |
| Chicepicatechin*                | 1.84            | 1.23  | 2.06     | 1.49  |
| 3,5 - dihydroxybenzoic acid     | 0.05            | 0.04  | 0.06     | N.D.  |
| Hydroxybenzoic acid             | 0.62            | 0.49  | 0.89     | 0.66  |
| Caffeic acid*                   | 0.09            | 0.08  | 0.14     | 0.09  |
| Procyanidin B1*                 | 1.33            | 0.68  | 1.27     | 1.25  |
| Chicoric acid*                  | 0.02            | 0.02  | 0.03     | 0.02  |
| Chlorogenic acid*               | 0.49            | 0.49  | 1.08     | 0.43  |
| Salvianolic acid K              | 0.84            | 0.66  | 1.46     | 0.87  |
| Caffeic acid methyl ester       | 2.26            | 1.70  | 2.61     | 2.46  |
| <b>Rosmarinic acid*</b>         | 4.63            | 3.41  | 5.01     | 5.39  |
| Ferulic acid*                   | 0.12            | 0.04  | 0.08     | 0.12  |
| Salvianolic acid I              | 0.04            | 0.03  | 0.11     | 0.05  |
| Methyl melitrate A              | 0.04            | 0.02  | 0.06     | 0.04  |
| Ferulic acid (der 1)            | 0.01            | 0.01  | 0.02     | 0.01  |
| Ferulic acid (der 2)            | 0.08            | 0.06  | 0.10     | 0.09  |
| Ferulic acid (der 3)            | 0.01            | 0.01  | 0.01     | 0.01  |
| Salvianolic acid A              | 0.49            | 0.37  | 0.57     | 0.53  |
| Salvianolic acid E              | 0.04            | 0.03  | 0.02     | 0.05  |
| <i>Iso</i> - salvianolic acid C | 0.14            | 0.10  | 0.20     | N.D.  |
| Salvianolic acid C              | 0.01            | N.D.  | 0.10     | N.D.  |
| Apigenin-7-O-acetylglucoside    | 0.19            | 0.14  | 0.26     | 0.20  |
| Luteolin-7-rutinoside           | 0.52            | 0.38  | 0.72     | 0.56  |

|                            |              |              |              |              |
|----------------------------|--------------|--------------|--------------|--------------|
| Luteolin-7-acetylglucoside | 0.86         | 0.60         | 1.13         | 0.89         |
| Luteolin-7-glucuronide     | 0.03         | 0.03         | 0.05         | 0.01         |
| Luteolin-7-glucoside       | 0.33         | 0.23         | 0.44         | 0.37         |
| Luteolin*                  | 1.79         | 1.30         | 2.20         | 1.93         |
| Apigenin-7-glucuronide     | 1.61         | 1.22         | 2.00         | 1.75         |
| Apigenin-7-glucoside       | 0.12         | 0.10         | 0.18         | 0.12         |
| Apigenin-O-pentoside       | 0.17         | 0.12         | 0.22         | 0.18         |
| Apigenin (der 1)           | 0.13         | 0.09         | 0.18         | 0.13         |
| Apigenin (der 2)           | 0.01         | 0.01         | 0.03         | 0.03         |
| <b>TOTAL</b>               | <b>20.31</b> | <b>15.21</b> | <b>24.82</b> | <b>20.69</b> |

HD - without pre-treatment. HD-RE - pre-treatment with reflux extraction, HD-REXPC - pre-treatment with reflux extraction assisted with xylanase, pectinase and cellulase, HD-US – pre-treatment with ultrasound extraction. N.D. - not detected. \*Authentic standards used: (+)-catechin, (-)-epicatechin, apigenin, luteolin, rosmarinic acid, caffeic acid, gallic acid, ferulic acid, chicoric acid, chlorogenic acid, procyanidin B1, procatechinic acid.

**Table S5.** Chemical composition of bay laurel water residues analysed by HPLC. Major compounds ( $\geq 3$  mg/g in any sample) are marked in blue.

| Bay laurel                    | W (mg/g) |       |          |       |
|-------------------------------|----------|-------|----------|-------|
|                               | HD       | HD-RE | HD-REPCX | HD-US |
| <b>Epicatechin-hexoside</b>   | 1.51     | 2.86  | 3.56     | 2.82  |
| (-)-epicatechin*              | 0.86     | 1.47  | 1.57     | 1.60  |
| (-)-epicatechin-3-O-gallate   | 0.35     | 0.64  | 1.07     | 0.97  |
| (+)-catechin*                 | 0.67     | 1.24  | 2.08     | 1.62  |
| <b>Procyanidin dimer I</b>    | 2.06     | 3.15  | 4.65     | 3.80  |
| Procyanidin dimer II          | 0.98     | 0.79  | 1.75     | 1.34  |
| Procyanidin trimer I          | 0.68     | 2.12  | 1.34     | 2.39  |
| Procyanidin trimer II         | 0.89     | 3.42  | 1.45     | 4.37  |
| <b>Procyanidin trimer III</b> | 2.57     | 4.19  | 4.92     | 3.85  |
| <b>Procyanidin trimer IV</b>  | 6.03     | 10.49 | 13.15    | 11.63 |

|                                |              |              |              |              |
|--------------------------------|--------------|--------------|--------------|--------------|
| Procyanidin trimer V           | 0.16         | N.D.         | 0.21         | 0.36         |
| Procyanidin tetramer I         | 0.42         | 0.81         | 1.19         | 0.83         |
| <b>Procyanidin tetramer II</b> | 2.66         | 4.98         | 4.93         | 5.43         |
| Apigenin-8-C-glucoside         | 0.04         | 0.05         | 0.07         | 0.06         |
| Apigenin-6-C-glucoside         | 0.14         | 0.16         | 0.17         | 0.37         |
| Quercetin-3-O-glucoside*       | 0.38         | 0.42         | 0.37         | 0.65         |
| Quercetin-3-O-rutinoside*      | 0.30         | 0.41         | 0.54         | N.D.         |
| Quercetin-O-hexoside           | 0.32         | 0.49         | 0.69         | 0.72         |
| Quercetin-O-pentoside          | 0.54         | 0.92         | 0.93         | 0.28         |
| Quercetin-O-rhamnoside         | 0.60         | 0.87         | 0.95         | 0.89         |
| Kaempferol-O-pentoside         | 0.08         | 0.13         | 0.23         | 1.09         |
| Kaempferol-O-hexoside          | 0.28         | 0.35         | 0.64         | 0.51         |
| Kaempferol-3-O-rutinoside*     | 0.16         | 0.25         | 0.27         | 0.26         |
| Isorhamnetin-O-hexoside        | 0.08         | 0.09         | 0.11         | 0.32         |
| Isorhamnetin-O-pentoside       | 0.02         | 0.02         | 0.01         | 0.03         |
| Isorhamnetin-O-rhamnoside      | 0.31         | 0.39         | 0.71         | 0.56         |
| <b>TOTAL</b>                   | <b>23.09</b> | <b>40.71</b> | <b>47.56</b> | <b>46.75</b> |

HD - without pre-treatment. HD-RE - pre-treatment with reflux extraction, HD-REXPC - pre-treatment with reflux extraction assisted with xylanase, pectinase and cellulase. HD-US – pre-treatment with ultrasound extraction. N.D. - not detected. \*Authentic standards used: (+)-catechin, (-)-epicatechin, apigenin, quercetin-3-O-glucoside, quercetin-3-O-rutinoside, kaempferol-3-O-rutinoside

**Table S6.** Chemical composition of rosemary water residues analysed by HPLC. Major compounds ( $\geq 3$  mg/g in any sample) are marked in **blue**.

| Rosemary          | W (mg/g) |       |          |       |
|-------------------|----------|-------|----------|-------|
|                   | HD       | HD-RE | HD-REPCX | HD-US |
| Gallic acid*      | 0.27     | N.D.  | 0.24     | N.D.  |
| Chlorogenic acid* | 0.30     | 0.08  | 0.14     | N.D.  |
| Caffeic acid*     | 0.84     | 1.20  | 0.81     | 0.44  |

|                                   |              |              |              |              |
|-----------------------------------|--------------|--------------|--------------|--------------|
| <b>Syringic acid*</b>             | 3.25         | 2.04         | 2.31         | 1.40         |
| <i>p</i> -coumaric acid*          | 2.19         | 1.11         | 1.69         | 1.32         |
| Carnosol                          | 0.10         | N.D.         | N.D.         | N.D.         |
| Carnosic acid                     | 0.34         | N.D.         | 0.16         | 0.11         |
| Ferulic acid*                     | 0.01         | N.D.         | N.D.         | N.D.         |
| <b>Rosmarinic acid*</b>           | 7.57         | 2.82         | 5.16         | 3.64         |
| Methyl rosmarinate                | 0.41         | 0.10         | 0.53         | 0.50         |
| Hesperidin                        | 0.15         | N.D.         | N.D.         | N.D.         |
| <b>Gallocatechin</b>              | 4.83         | 2.95         | 3.79         | 2.17         |
| Luteolin-3- <i>O</i> -glucuronide | 0.21         | 0.05         | 0.14         | 0.12         |
| Luteolin-7- <i>O</i> -rutinoside  | 0.11         | 0.06         | 0.09         | 0.07         |
| Luteolin- <i>O</i> -diglucoside   | 0.03         | 0.03         | 0.02         | N.D.         |
| Apigenin*                         | 0.20         | 0.50         | 0.16         | 0.16         |
| Apigenin-7- <i>O</i> -rutinoside  | 0.70         | N.D.         | 0.82         | 0.64         |
| Apigenin- <i>O</i> -pentoside     | 0.12         | 0.03         | N.D.         | N.D.         |
| Apigenin-7- <i>O</i> -glucuronide | 0.15         | 0.06         | 0.06         | 0.04         |
| Apigenin-7-glucoside              | 0.20         | 0.03         | 0.16         | 0.16         |
| Apigenin-acetylglucoside          | 0.14         | 0.03         | 0.08         | 0.06         |
| <b>TOTAL</b>                      | <b>22.12</b> | <b>11.09</b> | <b>16.36</b> | <b>10.83</b> |

HD - without pre-treatment. HD-RE - pre-treatment with reflux extraction. HD-REXPC - pre-treatment with reflux extraction assisted with xylanase, pectinase and cellulase. HD-US – pre-treatment with ultrasound extraction. N.D. - not detected. \*Authentic standards used: gallic acid, chlorogenic acid, caffeic acid, syringic acid, *p*-coumaric acid, ferulic acid, rosmarinic acid, apigenin, luteolin.

**Table S7.** Chemical composition of sage solid residue extracts analysed by HPLC. Major compounds ( $\geq 3$  mg/g in any sample) are marked in **blue**.

| Sage                            | w (mg/g)            |      |       |          |       |                     |      |       |          |       |                        |      |       |          |       |
|---------------------------------|---------------------|------|-------|----------|-------|---------------------|------|-------|----------|-------|------------------------|------|-------|----------|-------|
|                                 | Et-H <sub>2</sub> O |      |       |          |       | Me-H <sub>2</sub> O |      |       |          |       | Et-Me-H <sub>2</sub> O |      |       |          |       |
|                                 | RAW                 | HD   | HD-RE | HD-REXPC | HD-US | RAW                 | HD   | HD-RE | HD-REXPC | HD-US | RAW                    | HD   | HD-RE | HD-REXPC | HD-US |
| Gallic acid*                    | 0.07                | 0.13 | 0.19  | 0.24     | 0.19  | 0.13                | 0.16 | 0.18  | 0.18     | 0.23  | 0.14                   | 0.06 | 0.21  | 0.22     | 0.07  |
| Protocatechuic acid             | 0.05                | 0.02 | N.D.  | N.D.     | N.D.  | N.D.                | N.D. | N.D.  | N.D.     | N.D.  | 0.06                   | N.D. | N.D.  | N.D.     | N.D.  |
| Epicatechin*                    | 0.18                | 0.18 | 0.19  | 0.23     | 0.19  | N.D.                | 0.19 | 0.21  | 0.13     | 0.17  | N.D.                   | 0.24 | 0.18  | 0.26     | 0.22  |
| 3,5 - hydroxybenzoic acid (der) | 0.15                | 0.05 | 0.09  | 0.12     | 0.14  | 0.13                | 0.07 | 0.11  | 0.14     | 0.11  | 0.26                   | 0.05 | 0.08  | 0.10     | 0.07  |
| Hydroxybenzoic acid (der)       | 0.21                | N.D. | N.D.  | N.D.     | 0.04  | N.D.                | N.D. | N.D.  | N.D.     | 0.04  | 0.11                   | N.D. | 0.05  | 0.07     | 0.05  |
| Caffeic acid*                   | 0.27                | 0.04 | 0.03  | 0.05     | 0.04  | 0.06                | 0.03 | 0.04  | 0.04     | 0.04  | 0.06                   | 0.03 | 0.03  | 0.05     | 0.04  |
| Chicoric acid                   | 0.04                | 0.03 | 0.03  | 0.04     | 0.03  | 0.19                | 0.03 | 0.03  | 0.03     | 0.03  | 0.19                   | 0.03 | 0.03  | 0.04     | 0.03  |
| Salvianolic acid (der)          | 0.09                | N.D. | N.D.  | N.D.     | N.D.  | N.D.                | 0.13 | N.D.  | N.D.     | N.D.  | N.D.                   | N.D. | N.D.  | N.D.     | N.D.  |
| Procyanidin B1*                 | 0.17                | N.D. | N.D.  | N.D.     | N.D.  | N.D.                | N.D. | N.D.  | N.D.     | N.D.  | N.D.                   | N.D. | N.D.  | N.D.     | N.D.  |
| Chlorogenic acid*               | 0.07                | 0.12 | 0.20  | 0.28     | 0.19  | 0.37                | 0.07 | 0.19  | 0.13     | 0.13  | 0.41                   | 0.17 | 0.27  | 0.37     | 0.22  |
| Salvianolic acid K              | 0.49                | 0.09 | 0.13  | 0.17     | 0.16  | 0.06                | 0.12 | 0.12  | 0.19     | 0.14  | 0.45                   | 0.19 | 0.19  | 0.20     | 0.17  |
| Caffeic acid methyl ester       | 2.69                | 0.50 | 0.52  | 0.52     | 0.70  | 0.31                | 0.25 | 0.47  | 0.32     | 0.53  | 0.50                   | 0.61 | 0.45  | 0.49     | 0.57  |
| <b>Rosmarinic acid*</b>         | 11.53               | 2.00 | 1.43  | 1.83     | 1.84  | 2.56                | 1.71 | 1.36  | 1.16     | 1.41  | 4.30                   | 2.43 | 1.78  | 1.68     | 2.32  |
| Rosmarinic acid (der)           | 0.10                | N.D. | N.D.  | N.D.     | N.D.  | N.D.                | N.D. | N.D.  | N.D.     | 0.02  | N.D.                   | N.D. | N.D.  | N.D.     | N.D.  |
| Ferulic acid*                   | 0.09                | 0.01 | 0.02  | 0.02     | N.D.  | 0.02                | 0.01 | 0.01  | 0.01     | 0.01  | 0.02                   | 0.02 | 0.02  | 0.01     | 0.01  |
| Ferulic acid (der 1)            | 0.04                | 0.03 | 0.02  | 0.02     | N.D.  | 0.03                | 0.02 | 0.02  | 0.02     | 0.03  | 0.05                   | 0.02 | 0.02  | 0.02     | 0.02  |
| Ferulic acid (der 2)            | 0.16                | 0.02 | 0.02  | 0.03     | N.D.  | 0.01                | 0.02 | 0.02  | 0.02     | 0.02  | 0.02                   | 0.03 | 0.03  | 0.03     | 0.03  |
| Salvianolic acid A              | 0.32                | N.D. | N.D.  | N.D.     | N.D.  | N.D.                | N.D. | N.D.  | N.D.     | N.D.  | N.D.                   | N.D. | N.D.  | N.D.     | N.D.  |
| Salvianolic acid E              | 0.08                | N.D. | N.D.  | N.D.     | N.D.  | N.D.                | N.D. | N.D.  | N.D.     | N.D.  | N.D.                   | N.D. | N.D.  | N.D.     | N.D.  |
| Salvianolic acid C              | 0.43                | 0.18 | 0.02  | 0.17     | 0.11  | 0.38                | 0.19 | 0.17  | 0.08     | 0.09  | 0.52                   | 0.30 | 0.22  | 0.20     | 0.11  |
| Apigenin-7-O-acetylglucoside    | 0.35                | 0.04 | 0.03  | 0.05     | 0.04  | 0.24                | 0.03 | 0.03  | 0.04     | 0.04  | 0.26                   | 0.04 | 0.03  | 0.05     | 0.04  |
| Luteolin-7-rutinoside           | 0.64                | 0.08 | 0.10  | 0.14     | 0.12  | 0.38                | 0.07 | 0.09  | 0.10     | 0.10  | 0.33                   | 0.09 | 0.10  | 0.11     | 0.10  |
| Luteolin-7-acetylglucoside      | 0.10                | 0.03 | 0.04  | 0.06     | 0.05  | 0.08                | 0.03 | 0.03  | 0.05     | 0.04  | 0.08                   | 0.04 | 0.04  | 0.06     | 0.04  |

|                        |              |             |             |             |             |             |             |             |             |             |              |             |             |             |             |
|------------------------|--------------|-------------|-------------|-------------|-------------|-------------|-------------|-------------|-------------|-------------|--------------|-------------|-------------|-------------|-------------|
| Luteolin-7-glucuronide | 1.01         | 0.19        | 0.27        | 0.27        | 0.22        | 0.20        | 0.12        | 0.22        | 0.03        | 0.04        | 0.31         | 0.34        | 0.29        | 0.30        | 0.30        |
| Apigenin (der 1)       | 0.15         | 0.01        | 0.01        | 0.01        | 0.01        | 0.09        | 0.01        | 0.01        | 0.01        | 0.01        | 0.06         | 0.01        | 0.01        | 0.01        | 0.01        |
| Apigenin (der 2)       | 0.03         | N.D.        | 0.02        | 0.04        | 0.04        | 0.03        | 0.02        | N.D.        | N.D.        | N.D.        | N.D.         | N.D.        | N.D.        | N.D.        | N.D.        |
| Luteolin-7-glucoside   | 0.34         | 0.07        | 0.07        | 0.11        | 0.10        | 0.20        | 0.06        | 0.07        | 0.07        | 0.08        | 0.23         | 0.10        | 0.08        | 0.11        | 0.10        |
| <b>Luteolin*</b>       | 3.80         | 0.78        | 0.61        | 0.76        | 0.68        | 1.77        | 0.59        | 0.53        | 0.41        | 0.46        | 2.00         | 0.84        | 0.67        | 0.80        | 0.77        |
| Apigenin-7-glucuronide | 0.20         | 0.04        | 0.04        | 0.04        | 0.03        | 0.14        | 0.03        | 0.03        | 0.03        | 0.03        | 0.15         | 0.05        | 0.04        | 0.04        | 0.03        |
| Apigenin-7-glucoside   | 0.07         | 0.02        | 0.03        | 0.03        | 0.03        | 0.03        | 0.02        | 0.02        | 0.02        | 0.02        | 0.04         | 0.03        | 0.03        | 0.04        | 0.04        |
| Luteolin (der 1)       | 0.44         | 0.11        | 0.15        | 0.19        | 0.18        | 0.38        | 0.08        | 0.15        | 0.11        | 0.14        | 0.17         | 0.16        | 0.14        | 0.19        | 0.20        |
| Luteolin (der 2)       | 0.04         | 0.02        | 0.07        | 0.05        | 0.02        | 0.06        | N.D.        | 0.01        | 0.01        | N.D.        | 0.20         | 0.04        | 0.11        | 0.09        | 0.03        |
| Apigenin (der 3)       | 0.02         | 0.02        | 0.01        | N.D.        | N.D.        | 0.03        | N.D.        | N.D.        | N.D.        | N.D.        | 0.03         | 0.01        | 0.01        | 0.01        | 0.01        |
| <b>TOTAL</b>           | <b>24.47</b> | <b>4.85</b> | <b>4.35</b> | <b>5.51</b> | <b>5.15</b> | <b>7.87</b> | <b>4.06</b> | <b>4.12</b> | <b>3.34</b> | <b>3.97</b> | <b>10.98</b> | <b>5.93</b> | <b>5.13</b> | <b>5.57</b> | <b>5.65</b> |

RAW - dry plant material subjected directly to the ultrasound assisted extraction, without hydrodistillation. HD - hydrodistillation without pre-treatment. HD-RE - hydrodistillation pre-treatment with reflux extraction. HD-REXPC - hydrodistillation pre-treatment with reflux extraction assisted with xylanase, pectinase and cellulase. HD-US – hydrodistillation pre-treatment with ultrasound extraction. N.D. - not detected. \*Authentic standards used: (+)-catechin, (-)-epicatechin, apigenin, luteolin, rosmarinic acid, caffeic acid, gallic acid, ferulic acid, chlorogenic acid, procyanidin B1

**Table S8.** Chemical composition of bay laurel solid residue extracts analysed by HPLC. Major compounds ( $\geq 3$  mg/g in any sample) are marked in blue.

| Bay laurel                    | w(mg/g)             |             |             |             |             |                     |             |             |             |             |                        |             |             |             |              |
|-------------------------------|---------------------|-------------|-------------|-------------|-------------|---------------------|-------------|-------------|-------------|-------------|------------------------|-------------|-------------|-------------|--------------|
|                               | Et-H <sub>2</sub> O |             |             |             |             | Me-H <sub>2</sub> O |             |             |             |             | Et-Me-H <sub>2</sub> O |             |             |             |              |
|                               | RAW                 | HD          | HD-RE       | HD-REXPC    | HD-US       | RAW                 | HD          | HD-RE       | HD-REXPC    | HD-US       | RAW                    | HD          | HD-RE       | HD-REXPC    | HD-US        |
| <b>Epicatechin-hexoside</b>   | 3.19                | N.D.        | 0.47        | N.D.        | 0.85        | N.D.                | 0.06        | N.D.        | 0.06        | N.D.        | 0.37                   | 0.17        | 0.19        | 0.12        | 0.20         |
| (-)-epicatechin*              | 2.92                | 0.45        | 0.20        | 0.21        | 0.25        | 0.63                | 0.34        | 0.33        | 0.23        | 0.33        | 7.24                   | 0.43        | 0.26        | 0.31        | 0.28         |
| (-)-epicatechin-3-O-gallate   | 1.13                | 0.12        | N.D.        | N.D.        | 0.33        | N.D.                | N.D.        | N.D.        | N.D.        | N.D.        | 2.23                   | 0.15        | 0.29        | 0.07        | 0.31         |
| Procyanidin dimer II          | 1.32                | N.D.        | N.D.        | N.D.        | N.D.        | 1.19                | 0.37        | N.D.        | N.D.        | N.D.        | 2.10                   | N.D.        | N.D.        | N.D.        | N.D.         |
| <b>Procyanidin trimer III</b> | 8.17                | 4.84        | 2.26        | 2.12        | 3.82        | 6.08                | 2.28        | 2.75        | 1.45        | 5.96        | 27.81                  | 5.70        | 6.22        | 2.83        | 8.67         |
| Procyanidin tetramer II       | 0.35                | 0.44        | N.D.        | N.D.        | 0.21        | 0.29                | 0.86        | N.D.        | 0.47        | N.D.        | 1.03                   | 0.53        | N.D.        | 0.27        | N.D.         |
| Luteolin-6-C-glucoside        | 0.03                | 0.02        | N.D.        | N.D.        | N.D.        | 0.01                | 0.02        | N.D.        | 0.01        | N.D.        | 0.05                   | 0.03        | 0.01        | 0.01        | 0.01         |
| Quercetin-3-O-rutinoside*     | 0.08                | 0.15        | N.D.        | 0.07        | N.D.        | 0.05                | 0.12        | 0.07        | 0.08        | 0.08        | 0.15                   | 0.17        | N.D.        | 0.10        | N.D.         |
| Quercetin-O-hexoside          | 0.29                | 0.30        | 0.06        | 0.14        | 0.11        | 0.22                | 0.21        | N.D.        | 0.14        | N.D.        | 0.59                   | 0.33        | 0.09        | 0.22        | 0.11         |
| Quercetin-O-pentoside         | 0.29                | 0.30        | 0.08        | 0.10        | 0.21        | 0.27                | 0.20        | 0.08        | 0.13        | 0.13        | 0.70                   | 0.34        | 0.13        | 0.16        | 0.21         |
| Quercetin-O-pentoside         | 0.35                | N.D.        | 0.15        | N.D.        | 0.30        | 0.28                | N.D.        | 0.16        | N.D.        | 0.20        | 0.64                   | N.D.        | 0.25        | N.D.        | 0.30         |
| Quercetin-O-rhamnoside        | 0.67                | 0.25        | 0.18        | 0.31        | 0.37        | 0.56                | 0.20        | 0.21        | 0.32        | 0.25        | 1.47                   | 0.28        | 0.30        | 0.50        | 0.37         |
| Apigenin-6-C-glucoside        | 0.10                | 0.06        | N.D.        | 0.02        | N.D.        | 0.06                | 0.05        | N.D.        | 0.03        | N.D.        | 0.20                   | 0.07        | 0.03        | 0.03        | 0.03         |
| Apigenin-8-C-glucoside        | 0.02                | 0.01        | 0.02        | N.D.        | 0.03        | 0.01                | 0.01        | 0.02        | N.D.        | 0.02        | 0.03                   | 0.01        | 0.01        | N.D.        | 0.01         |
| Kaempferol-3-O-rutinoside*    | 0.22                | 0.10        | 0.05        | 0.04        | 0.09        | 0.17                | 0.08        | 0.06        | 0.05        | 0.07        | 0.48                   | 0.11        | 0.08        | 0.06        | 0.09         |
| Kaempferol-O-pentoside        | 0.77                | 0.62        | 0.27        | 0.04        | 0.52        | 0.62                | 0.44        | 0.29        | 0.04        | 0.35        | 1.61                   | 0.70        | 0.45        | 0.07        | 0.52         |
| Kaempferol-O-hexoside         | 0.68                | 0.42        | 0.16        | 0.17        | 0.34        | 0.51                | 0.29        | 0.17        | 0.17        | 0.20        | 1.69                   | 0.47        | 0.30        | 0.28        | 0.04         |
| Isorhamnetin-O-hexoside       | 0.07                | 0.14        | 0.04        | 0.02        | 0.08        | 0.08                | 0.06        | 0.05        | 0.02        | 0.05        | 0.16                   | 0.10        | 0.07        | 0.04        | 0.08         |
| Isorhamnetin-O-pentoside      | 0.09                | 0.03        | 0.03        | N.D.        | 0.06        | 0.07                | 0.02        | 0.03        | N.D.        | 0.04        | 0.24                   | 0.03        | 0.06        | N.D.        | 0.06         |
| <b>TOTAL</b>                  | <b>20.74</b>        | <b>8.25</b> | <b>3.97</b> | <b>3.24</b> | <b>7.57</b> | <b>11.10</b>        | <b>5.61</b> | <b>4.22</b> | <b>3.20</b> | <b>7.68</b> | <b>48.79</b>           | <b>9.62</b> | <b>8.74</b> | <b>5.07</b> | <b>11.29</b> |

RAW - dry plant material subjected directly to the ultrasound assisted extraction, without hydrodistillation. HD - hydrodistillation without pre-treatment. HD-RE - hydrodistillation pre-treatment with reflux extraction. HD-REXPC - hydrodistillation pre-treatment with reflux extraction assisted with xylanase, pectinase and cellulase. HD-US - hydrodistillation pre-treatment with ultrasound extraction. N.D. - not detected. \*Authentic standards used: (+)-catechin, (-)-epicatechin, apigenin, quercetin-3-O-glucoside, quercetin-3-O-rutinoside, kaempferol-3-O-rutinoside.

**Table S9.** Chemical composition of rosemary solid residue extracts analysed by HPLC. Major compounds ( $\geq 3$  mg/g in any sample) are marked in **blue**.

| Rosemary                 | w(mg/g)             |             |             |             |             |                     |             |             |             |             |                        |             |             |             |             |
|--------------------------|---------------------|-------------|-------------|-------------|-------------|---------------------|-------------|-------------|-------------|-------------|------------------------|-------------|-------------|-------------|-------------|
|                          | Et-H <sub>2</sub> O |             |             |             |             | Me-H <sub>2</sub> O |             |             |             |             | Et-Me-H <sub>2</sub> O |             |             |             |             |
|                          | RAW                 | HD          | HD-RE       | HD-REXPC    | HD-US       | RAW                 | HD          | HD-RE       | HD-REXPC    | HD-US       | RAW                    | HD          | HD-RE       | HD-REXPC    | HD-US       |
| Gallocatehin             | 0.23                | N.D.        | 0.35        | N.D.        | 0.20        | 0.25                | 0.97        | 0.28        | N.D.        | 0.19        | 0.26                   | N.D.        | 0.33        | N.D.        | 0.18        |
| Chlorogenic acid*        | 0.05                | N.D.        | 0.02        | N.D.        | 0.01        | 0.14                | N.D.        | 0.02        | N.D.        | 0.02        | 0.20                   | N.D.        | 0.02        | N.D.        | 0.01        |
| Caffeic acid*            | 0.01                | 0.23        | 0.05        | 0.47        | 0.04        | N.D.                | 0.21        | 0.06        | 0.37        | N.D.        | N.D.                   | 0.22        | N.D.        | 0.49        | N.D.        |
| Syringic acid*           | 0.39                | 0.39        | 0.25        | 0.22        | 0.18        | 0.71                | 0.20        | 0.36        | 0.13        | 0.09        | 0.70                   | 0.20        | 0.41        | 0.17        | 0.18        |
| Ferulic acid*            | 0.02                | N.D.        | N.D.        | N.D.        | N.D.        | N.D.                | N.D.        | N.D.        | N.D.        | N.D.        | 0.02                   | N.D.        | 0.03        | N.D.        | 0.02        |
| <b>Rosmarinic acid*</b>  | 2.59                | 3.73        | 1.04        | 1.23        | 1.22        | 2.87                | 3.25        | 0.55        | 0.87        | 0.90        | 4.09                   | 3.60        | 0.91        | 1.23        | 1.31        |
| Hesperidin               | 0.14                | N.D.        | 0.06        | N.D.        | 0.07        | 0.15                | N.D.        | 0.04        | N.D.        | 0.05        | 0.21                   | N.D.        | N.D.        | N.D.        | 0.01        |
| Apigenin*                | 0.16                | 0.18        | 0.19        | 0.32        | 0.23        | 0.65                | 0.28        | 0.12        | 0.19        | 0.18        | 0.83                   | 0.38        | 0.19        | 0.31        | 0.23        |
| Luteolin-7-O-glucuronide | 0.05                | N.D.        | 0.06        | N.D.        | 0.07        | 0.07                | N.D.        | 0.04        | N.D.        | 0.06        | 0.10                   | N.D.        | 0.07        | N.D.        | 0.07        |
| Luteolin-3-O-glucuronid  | 0.05                | 0.13        | N.D.        | 0.17        | N.D.        | N.D.                | 0.05        | N.D.        | 0.06        | N.D.        | N.D.                   | 0.02        | N.D.        | 0.21        | N.D.        |
| <b>TOTAL</b>             | <b>3.69</b>         | <b>4.66</b> | <b>2.02</b> | <b>2.41</b> | <b>2.02</b> | <b>4.84</b>         | <b>4.96</b> | <b>1.47</b> | <b>1.62</b> | <b>1.49</b> | <b>6.41</b>            | <b>4.42</b> | <b>1.96</b> | <b>2.41</b> | <b>2.01</b> |

RAW - dry plant material subjected directly to the ultrasound assisted extraction, without hydrodistillation. HD - hydrodistillation without pre-treatment. HD-RE - hydrodistillation pre-treatment with reflux extraction. HD-REXPC - hydrodistillation pre-treatment with reflux extraction assisted with xylanase, pectinase and cellulase. HD-US – hydrodistillation pre-treatment with ultrasound extraction. N.D. - not detected. \*Authentic standards used: gallic acid, chlorogenic acid, caffeic acid, syringic acid, *p*--coumaric acid, ferulic acid, rosmarinic acid, apigenin, luteolin.

## Supplementary Figures

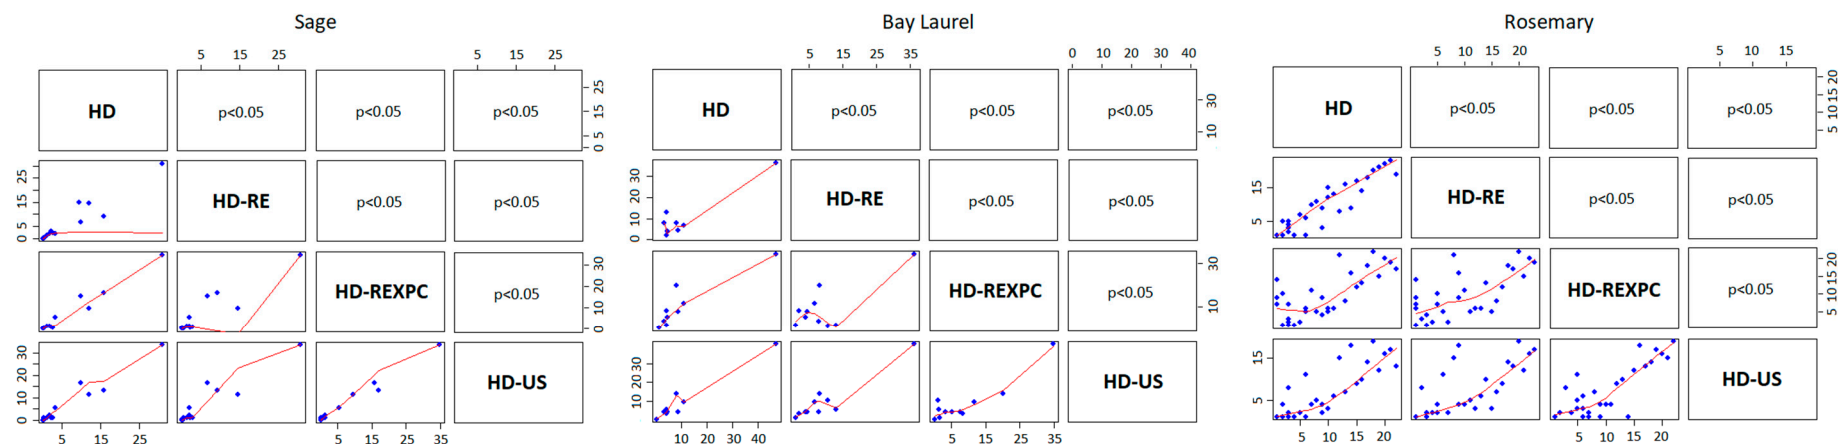

**Figure S1.** Scatter plot showing correlations between different pre-treatments (on the diagonal) regarding chemical composition of hydrolates. Significant  $p$ -values based on Spearman's rank test are shown above the diagonal, while bivariate scatter plots are shown below the diagonal. HD - hydrodistillation without pre-treatment. HD-RE - hydrodistillation pre-treatment with reflux extraction. HD-REXPC - hydrodistillation pre-treatment with reflux extraction assisted with xylanase, pectinase and cellulase. HD-US - hydrodistillation pre-treatment with ultrasound extraction.

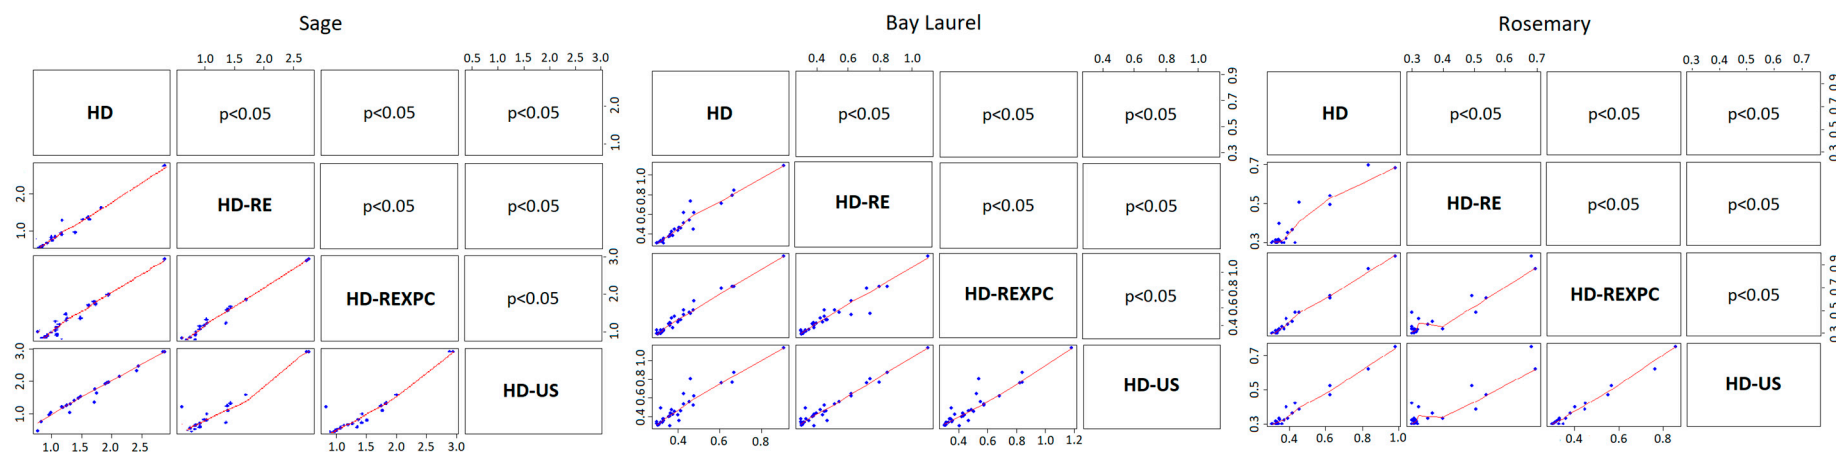

**Figure S2.** Scatter plot showing correlations between different pre-treatments (on the diagonal) regarding chemical composition of water residues. Significant  $p$ -values based on Spearman's rank test are shown above the diagonal, while bivariate scatter plots are shown below the diagonal. HD - hydrodistillation without pre-treatment. HD-RE - hydrodistillation pre-treatment with reflux extraction. HD-REXPC - hydrodistillation pre-treatment with reflux extraction assisted with xylanase, pectinase and cellulase. HD-US – hydrodistillation pre-treatment with ultrasound extraction.

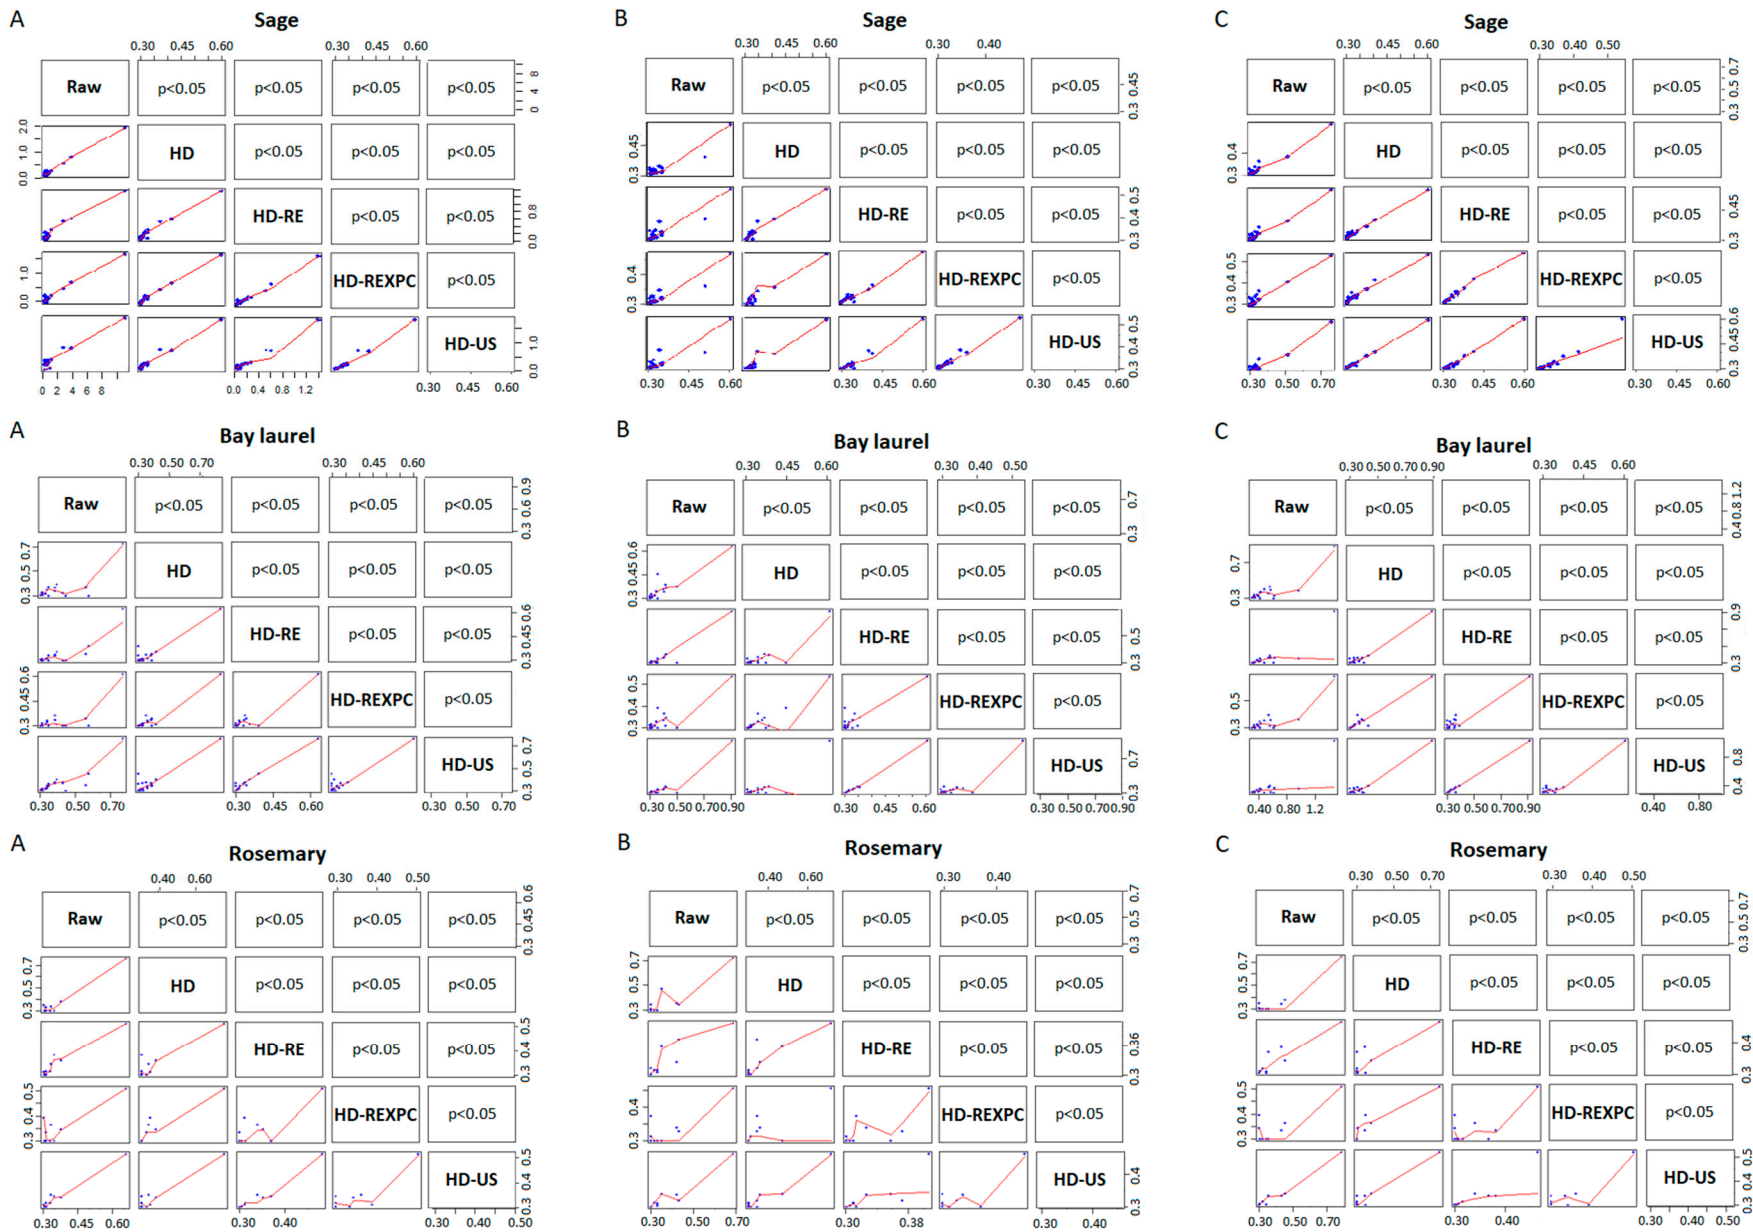

**Figure S3.** Scatter plot showing correlations between different pre-treatments (on the diagonal) regarding chemical composition of solid residue extracts extracted with different solvents: A - ethanol (ethanol:water = 1:1), B - methanol (methanol:water = 1:1), C - ethanol-methanol (ethanol:methanol:water = 1:1:1). Significant p-values based on Spearman's rank test are shown above the diagonal, while bivariate scatter plots are shown below the diagonal. Raw - dry plant material subjected directly to the ultrasound assisted extraction, without hydrodistillation. HD - hydrodistillation without pre-treatment. HD-RE - hydrodistillation pre-treatment with reflux extraction. HD-REXPC - hydrodistillation pre-treatment with reflux extraction assisted with xylanase, pectinase and cellulase. HD-US – hydrodistillation pre-treatment with ultrasound extraction

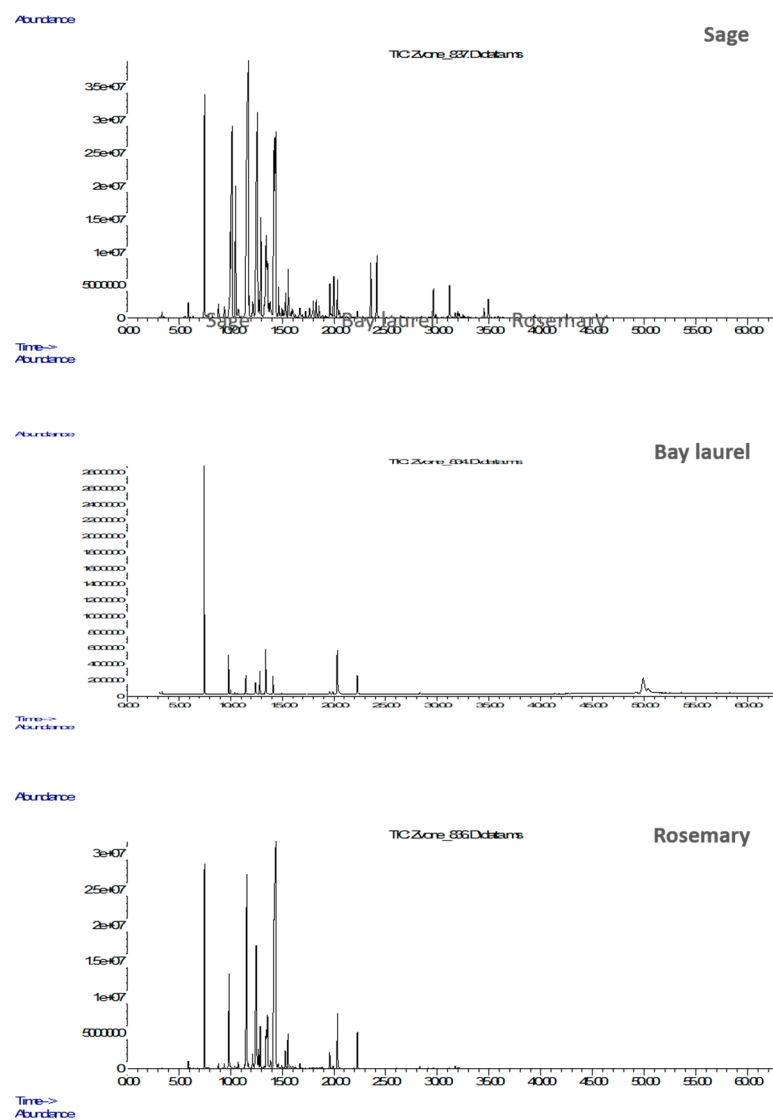

**Figure S4.** Total ion chromatograms of sage, bay laurel and rosemary hydrolates, obtained after hydrodistillation without pre-treatment (HD) and determined by GC-MS. Similar chemical profiles were obtained with different pre-treatments: HD-RE – hydrodistillation with reflux extraction pre-treatment, HD-US - hydrodistillation with ultrasound extraction pre-treatment, HD-REXPC – hydrodistillation with reflux extraction pre-treatment assisted with cell wall-degrading enzymes (xylanase, pectinase and cellulase).

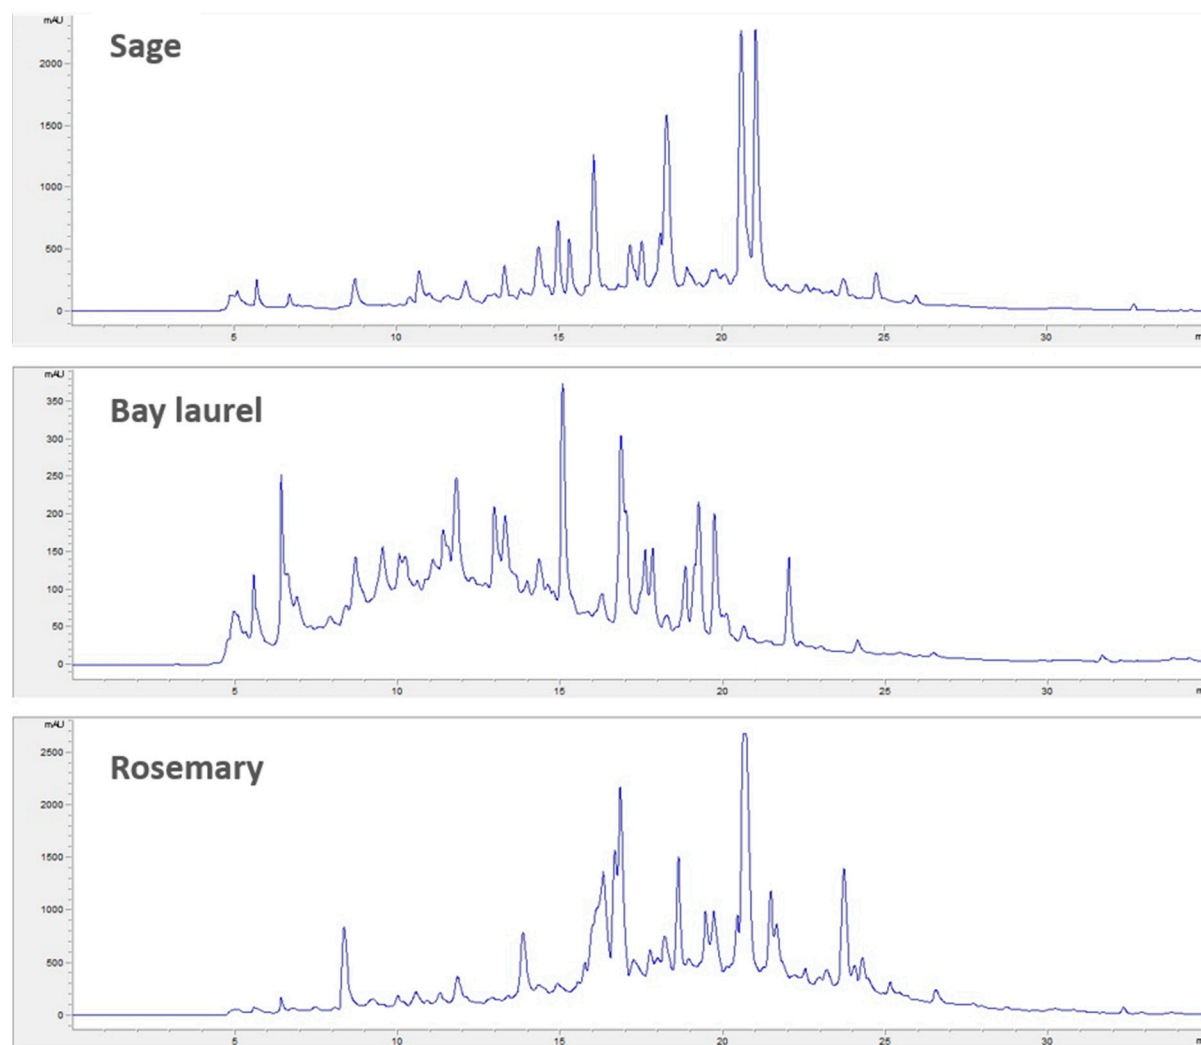

**Figure S5.** HPLC UV-VIS/PDA chromatograms of phenolic compounds obtained from sage, bay laurel and rosemary water residues and recorded at 278 nm. Similar chemical profiles were obtained with different pre-treatments: HD-RE – hydrodistillation with reflux extraction pre-treatment, HD-US - hydrodistillation with ultrasound extraction pre-treatment, HD-REXPC – hydrodistillation with reflux extraction pre-treatment assisted with cell wall-degrading enzymes (xylanase, pectinase and cellulase).

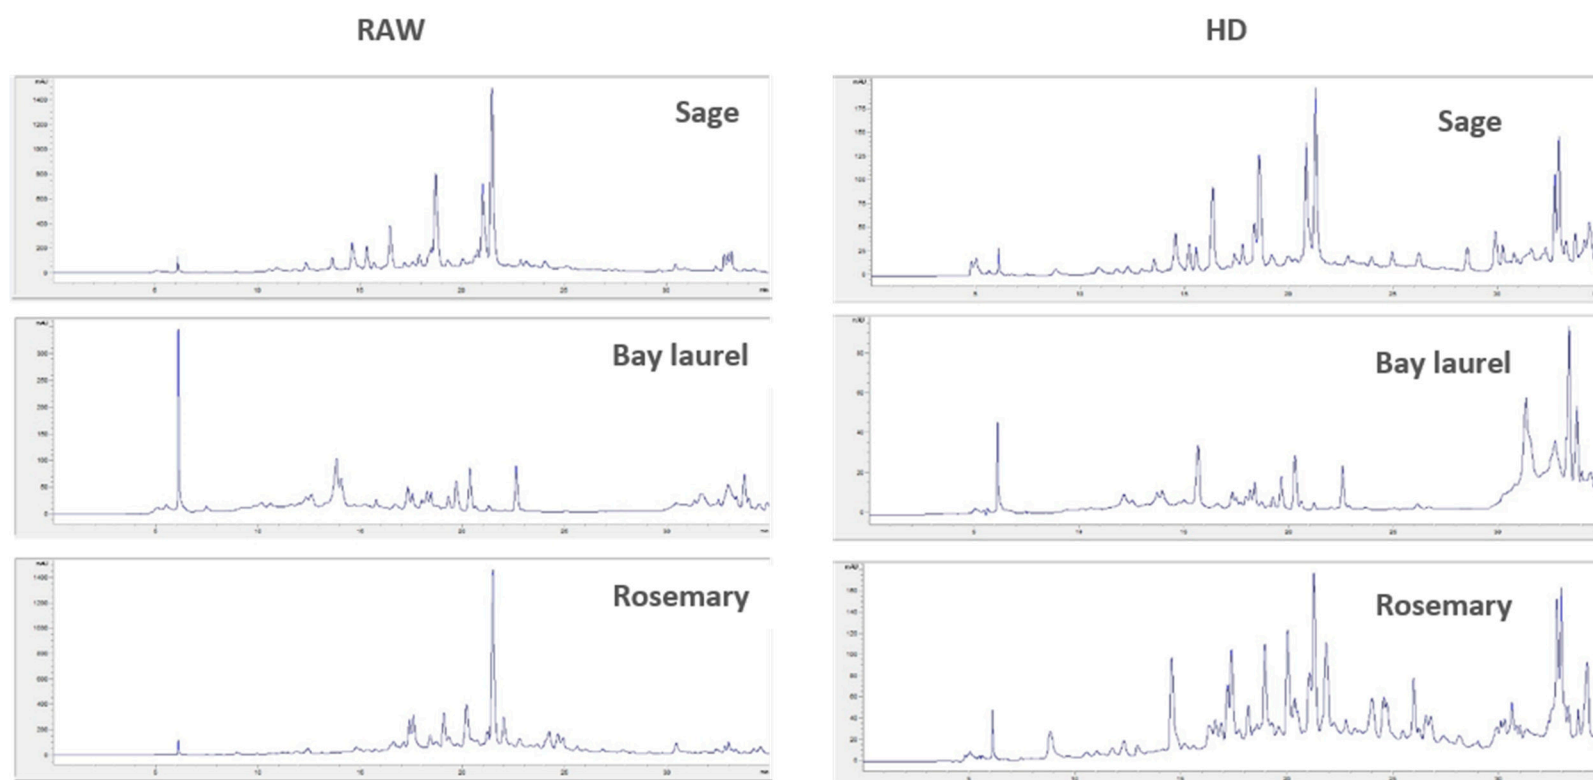

**Figure S6.** HPLC UV-VIS/PDA chromatograms of phenolic compounds obtained from sage, bay laurel and rosemary solid residues and recorded at 278 nm. Solid residues remaining after hydrodistillation (HD) were treated with ultrasound and Et-H<sub>2</sub>O (ethanol : water = 1 : 1 v/v) as a solvent. Furthermore, hydrodistillation was omitted and dry plant material was subjected directly to ultrasound-assisted extraction with different solvents (RAW). Similar chemical profiles were obtained after different pre-treatments: HD-RE - reflux extraction, HD-REXPC - reflux extraction assisted with cell wall-degrading enzymes (xylanase, pectinase and cellulase), HD-US - ultrasound extraction; or with different solvents (Me-H<sub>2</sub>O - methanol : water = 1 : 1 v/v; Et-Me-H<sub>2</sub>O - ethanol : methanol : water = 1 : 1 : 1 v/v/v).
